## The predicting system of prognosis for transthyretin amyloid cardiomyopathy

N.N. Nakashima, S.T. Takashio, M.M. Morioka, M.N. Nishi, K.H. Hirakawa, S.H. Hanatani, K.T. Tsujita

Kumamoto University Hospital, Cardiovascular Medicine, Kumamoto, Japan

**Funding Acknowledgement:** Type of funding sources: None.

**Background:** The staging systems for transthyretin amyloid cardiomyopathy (ATTR-CM) by high sensitivity cardiac troponin T (hs-cTnT), N-terminal pro-B-type natriuretic peptide (NT-proBNP) and estimated glomerular filtration rate (eGFR) are established. However, this system is not validated in Japan.

**Purpose:** The aim of study was to validate and modify the predicting system by BNP, hs-cTnT and eGFR of prognosis for Japanese patients with ATTRwt-CM.

**Method:** We evaluated in 158 consecutive patients with wild-type ATTR-CM. Univariate analysis revealed that increased hs-cTnT and B-type natriuretic peptide (BNP) levels and impaired renal function at diagnosis were

associated with poor prognosis. We defined best cutoff value as follows by ROC curve analysis; hs-cTnT >0.0565 ng/mL, BNP >285 pg/mL and eGFR <45 mL/min. We scored the index by adding 1 point for each factor and divide into low score group (0–1 point) and high score group (2–3 points).

**Result:** As shown figure, high score was associated with increased all-cause mortality and heart failure rehospitalization (log rank;  $P < 0.001$ , respectively).

**Conclusion:** This simple scoring system by hs-cTnT, BNP and eGFR, was useful for predicting prognosis in patients with wild-type ATTR-CM.

### Kaplan-Meier analysis by scoring system

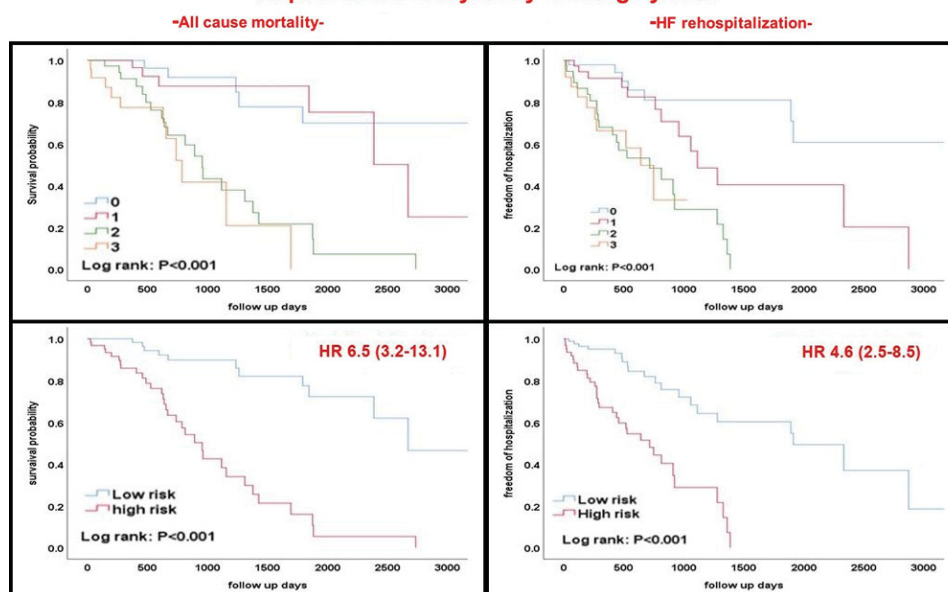

Source: https://academic.oup.com/eurheartj/article-pdf/42/Supplement_1/ehab724.0875/41049585/ehab724.0875.pdf
